# Supplementary material for: Distinguishing different modes of growth using single-cell data
Source: PubMed Central journal article supplement (PMC8727026; doi:10.7554/elife.72565), 2021-12-02
Supplement: elife-72565-supp1.pdf [file elife-72565-supp1.pdf]

1 Distinguishing different modes of growth using  
2 single-cell data - Supplementary Information

3 Prathitha Kar<sup>1,2</sup>, Sriram Tiruvadi-Krishnan<sup>3</sup>, Jaana Männik<sup>3</sup>, Jaan Männik<sup>\*3</sup>,  
4 and Ariel Amir<sup>†1</sup>

5 <sup>1</sup>*School of Engineering and Applied Sciences, Harvard University, Cambridge,*  
6 *MA 02134, USA*

7 <sup>2</sup>*Department of Chemistry and Chemical Biology, Harvard University,*  
8 *Cambridge, MA 02138, USA*

9 <sup>3</sup>*Department of Physics and Astronomy, University of Tennessee, Knoxville,*  
10 *TN 37996, USA*

---

\*Corresponding author- email: [jmannik@utk.edu](mailto:jmannik@utk.edu); phone: +1 (865) 974 6018

†Corresponding author- email: [arielamir@seas.harvard.edu](mailto:arielamir@seas.harvard.edu); phone: +1 (617) 495 5818

Table S1: Variable definitions.

| Variables                                            | Description                                                                                                                                                                  |
|------------------------------------------------------|------------------------------------------------------------------------------------------------------------------------------------------------------------------------------|
| $L_b$                                                | Length of the cell at birth and also a proxy for size at birth                                                                                                               |
| $L_d$                                                | Length of the cell at division and also a proxy for size at division                                                                                                         |
| $l_b$                                                | $\frac{L_b}{\langle L_b \rangle}$ , where $\langle L_b \rangle$ is mean size at birth                                                                                        |
| $l_d$                                                | $\frac{L_d}{\langle L_b \rangle}$ , where $\langle L_b \rangle$ is mean size at birth                                                                                        |
| $f(l_b)$                                             | Mathematical function which captures the regulation strategy determining division given size at birth. $f(l_b) = 2l_b^{1-\alpha}$                                            |
| $T_d$                                                | Generation time                                                                                                                                                              |
| $\sigma_t$                                           | Standard deviation of generation time                                                                                                                                        |
| $x_n$ or $x$                                         | $x_n = \ln(l_b^n)$ . Since $l_b \approx 1$ , $x_n \approx l_b^n - 1$                                                                                                         |
| $\sigma_x$                                           | Standard deviation of $x_n$                                                                                                                                                  |
| $f_1(x_n)$                                           | Gaussian describing the distribution of $x_n$ . $f_1(x_n) = \frac{1}{\sqrt{2\pi\sigma_x^2}} \exp\left(-\frac{x_n^2}{2\sigma_x^2}\right)$                                     |
| $\langle \lambda \rangle$                            | Mean growth rate                                                                                                                                                             |
| $CV_\lambda$                                         | Coefficient of variation of growth rate                                                                                                                                      |
| $\xi(0, CV_\lambda)$                                 | Normally distributed growth rate noise. Growth rate is defined as $\lambda = \langle \lambda \rangle + \langle \lambda \rangle \xi(0, CV_\lambda)$                           |
| $f_2(\xi)$                                           | Gaussian describing the distribution of random variable $\xi(0, CV_\lambda)$ . $f_2(\xi) = \frac{1}{\sqrt{2\pi CV_\lambda^2}} \exp\left(-\frac{\xi^2}{2CV_\lambda^2}\right)$ |
| $\frac{\zeta(0, \sigma_n)}{\langle \lambda \rangle}$ | Normally distributed time additive division timing noise with mean 0 and standard deviation $\frac{\sigma_n}{\langle \lambda \rangle}$                                       |

|                                                   |                                                                                                                                                                                                                                                    |
|---------------------------------------------------|----------------------------------------------------------------------------------------------------------------------------------------------------------------------------------------------------------------------------------------------------|
| $f_3(\zeta)$                                      | Gaussian describing the distribution of random variable $\zeta(0, \sigma_n)$ . $f_3(\zeta) = \frac{1}{\sqrt{2\pi\sigma_n^2}} \exp\left(-\frac{\zeta^2}{2\sigma_n^2}\right)$                                                                        |
| $\zeta_s(0, \sigma_{bd})$                         | Normally distributed size additive division timing noise with mean 0 and standard deviation $\sigma_{bd}$                                                                                                                                          |
| $\sigma_l$                                        | Standard deviation of $\ln(\frac{L_d}{L_b})$                                                                                                                                                                                                       |
| $f_4\left(\ln\left(\frac{L_d}{L_b}\right)\right)$ | Gaussian describing the distribution of $\ln(\frac{L_d}{L_b})$ . $f_4\left(\ln\left(\frac{L_d}{L_b}\right)\right) = \frac{1}{\sqrt{2\pi\sigma_l^2}} \exp\left(-\frac{\left(\ln\left(\frac{L_d}{L_b}\right) - \ln(2)\right)^2}{2\sigma_l^2}\right)$ |
| $\rho_{exp}$                                      | Correlation coefficient of the pair $(\ln(\frac{L_d}{L_b}), \langle\lambda\rangle T_d)$                                                                                                                                                            |
| $m_{tl}$                                          | Slope of the best linear fit for $\ln(\frac{L_d}{L_b})$ vs $\langle\lambda\rangle T_d$ plot                                                                                                                                                        |
| $c_{tl}$                                          | Intercept of the best linear fit for $\ln(\frac{L_d}{L_b})$ vs $\langle\lambda\rangle T_d$ plot                                                                                                                                                    |
| $m_{lt}$                                          | Slope of the best linear fit for $\langle\lambda\rangle T_d$ vs $\ln(\frac{L_d}{L_b})$ plot                                                                                                                                                        |
| $c_{lt}$                                          | Intercept of the best linear fit for $\langle\lambda\rangle T_d$ vs $\ln(\frac{L_d}{L_b})$ plot                                                                                                                                                    |
| $\langle\lambda_{lin}\rangle$                     | Mean normalized elongation speed                                                                                                                                                                                                                   |
| $CV_{\lambda,lin}$                                | Coefficient of variation of normalized elongation speed                                                                                                                                                                                            |
| $\xi_{lin}(0, CV_{\lambda,lin})$                  | Normally distributed normalized elongation speed noise. Normalized elongation speed is defined as $\lambda_{lin} = \langle\lambda_{lin}\rangle + \langle\lambda_{lin}\rangle \xi_{lin}(0, CV_{\lambda,lin})$                                       |
| $\sigma_{l,lin}$                                  | Standard deviation of $l_d - l_b$                                                                                                                                                                                                                  |
| $\rho_{lin}$                                      | Correlation coefficient of the pair $(l_d - l_b, \langle\lambda_{lin}\rangle T_d)$                                                                                                                                                                 |
| $m_{tl,lin}$                                      | Slope of the best linear fit for $l_d - l_b$ vs $\langle\lambda_{lin}\rangle T_d$ plot                                                                                                                                                             |
| $c_{tl,lin}$                                      | Intercept of the best linear fit for $l_d - l_b$ vs $\langle\lambda_{lin}\rangle T_d$ plot                                                                                                                                                         |
| $m_{lt,lin}$                                      | Slope of the best linear fit for $\langle\lambda_{lin}\rangle T_d$ vs $l_d - l_b$ plot                                                                                                                                                             |
| $c_{lt,lin}$                                      | Intercept of the best linear fit for $\langle\lambda_{lin}\rangle T_d$ vs $l_d - l_b$ plot                                                                                                                                                         |
| $L_i$                                             | Cell size at the start of DNA replication (initiation)                                                                                                                                                                                             |

|                  |                                                                       |
|------------------|-----------------------------------------------------------------------|
| $L_i^{tot,next}$ | Total cell size of the daughter cells at the start of DNA replication |
| $\Delta_{ii}$    | Size added per origin between initiations                             |
| O                | Number of origins just after initiation                               |
| C+D              | Time between initiation and division                                  |
| $T_n$            | Timing of start of septum formation/onset of constriction             |
| $L_n$            | Cell size at time $T_n$                                               |

Table S2: The slope and the intercept of the best linear fit along with their 95% confidence intervals (CI) obtained on performing linear regression on experimental data. The data is collected for cells growing in M9 alanine, glycerol and glucose-cas media [S1].

| Media       | No. of cells | $T_d$ (min) | $\ln(\frac{L_d}{L_b})$ vs $\langle \lambda \rangle T_d$ plot |                         | $\langle \lambda \rangle T_d$ vs $\ln(\frac{L_d}{L_b})$ plot |                         |
|-------------|--------------|-------------|--------------------------------------------------------------|-------------------------|--------------------------------------------------------------|-------------------------|
|             |              |             | Slope (with 95% CI)                                          | Intercept (with 95% CI) | Slope (with 95% CI)                                          | Intercept (with 95% CI) |
| Alanine     | 816          | 214         | 0.34 (0.31, 0.36)                                            | 0.44 (0.42, 0.46)       | 1.06 (0.98, 1.14)                                            | -0.01 (-0.07, 0.04)     |
| Glycerol    | 648          | 164         | 0.34 (0.32, 0.37)                                            | 0.43 (0.41, 0.44)       | 1.26 (1.16, 1.35)                                            | -0.13 (-0.20, -0.07)    |
| Glucose-cas | 737          | 65          | 0.31 (0.28, 0.34)                                            | 0.42 (0.40, 0.44)       | 0.91 (0.83, 1.00)                                            | 0.09 (0.03, 0.15)       |

## 11 References

- 12 S1. Tiruvadi Krishnan, S., Männik, J., Kar, P., Lin, J., Amir, A., and Männik, J. (2021).  
13 Replication-related control over cell division in *Escherichia coli* is growth-rate depen-  
14 dent. bioRxiv, 10.1101/2021.02.18.431686 .
